# Supplementary material for: Socioeconomic status as an effect modifier of alcohol consumption and harm: analysis of linked cohort data
Source: PubMed Central journal article supplement (PMC5463030; doi:10.1016/s2468-2667(17)30078-6), 2017-05-10
Supplement: mmc1.pdf [file mmc1.pdf]

# THE LANCET

## Public Health

### Supplementary appendix

This appendix formed part of the original submission and has been peer reviewed. We post it as supplied by the authors.

Supplement to: Katikireddi SV, Whitley E, Lewsey J, Gray L, Leyland AH. Socioeconomic status as an effect modifier of alcohol consumption and harm: analysis of linked cohort data. *Lancet Public Health* 2017; published online May 10. [http://dx.doi.org/10.1016/S2468-2667\(17\)30078-6](http://dx.doi.org/10.1016/S2468-2667(17)30078-6).

**Web Appendix 1: Exclusions by data collection wave**

|                                                                                             | 1995            | 1998            | 2003            | 2008            | 2009            | 2010            | 2011            | 2012            |
|---------------------------------------------------------------------------------------------|-----------------|-----------------|-----------------|-----------------|-----------------|-----------------|-----------------|-----------------|
| N respondents                                                                               | 7,932           | 9,340           | 11,420          | 8,170           | 10,116          | 9,015           | 9,510           | 6,602           |
| N over 16                                                                                   | 7,932           | 9,040           | 8,107           | 6,428           | 7,517           | 7,229           | 7,530           | 4,815           |
| N (%) over 16 refused follow-up                                                             | 569<br>( 7.2)   | 735<br>( 8.1)   | 662<br>( 8.2)   | 840<br>(13.1)   | 1,100<br>(14.6) | 941<br>(13.0)   | 1,023<br>(13.6) | 674<br>(14.0)   |
| N (%) over 16 with alcohol event pre-interview<br>or ever experiencing a drug-related event | 185<br>( 2.3)   | 273<br>( 3.0)   | 225<br>( 2.8)   | 205<br>( 3.2)   | 256<br>( 3.4)   | 254<br>( 3.5)   | 267<br>( 3.6)   | 153<br>( 3.2)   |
| N (%) over 16s in analytical sample                                                         | 7,178<br>(90.5) | 8,032<br>(88.9) | 7,220<br>(89.1) | 5,383<br>(83.7) | 6,161<br>(82.0) | 6,034<br>(83.5) | 6,240<br>(82.9) | 3,988<br>(82.8) |

In general, the Scottish Health Survey excludes households that have previously participated in the survey from the sampling frame. There were a handful of occasions when the same individual was recruited into the study on two occasions (following the person moving address). When this occurred, baseline data for analysis were chosen randomly.

## **Web Appendix 2**

---

### **Alcohol-related hospital episodes**

*Prior to 01/04/1996*

ICD-9 codes hospital episodes 2651, 3039, 3050, 2918, 2910, 2913, 2915, 2919, 2911, 2912, 2918, 3575, 4255, 5353, 5710, 5711, 5712, 5713, 7607, 7598, 7903, 9800, 9801, 9809, E860, V57, E9473, E9509, E9809, E8600\*, E8601\*, E8609\*, E9509\*, 5711<sup>§</sup>, 6554<sup>§</sup>, 2550<sup>§</sup>, 3594<sup>§</sup>, 5709<sup>§</sup>, 3483<sup>§</sup>, D3039+A3317<sup>a</sup>, D3039+A3344<sup>a</sup>

*01/04/1996 onward*

ICD-10 codes F10, K70, X45, X65, Y15, Y90, Y91, E244, E512, G312, G621, G721, I426, K292, K860, O354, P043, Q860, R780, T510, T511, T519, Y573, Z502, Z714, Z721

---

### **Alcohol-related deaths**

*Prior to 01/01/2000*

Main ICD-9 codes deaths 4255, 5710, 5711, 5712, 5713, 5714, 5715, 5718, 5719, E860, 291, 303, 305

*01/01/2000 onward*

ICD-10 codes deaths G312, G621, I426, K292, K740, K741, K742, K746, K860, F10, K70, K73, X45, X65, Y15

---

The ICD codes here follow those used by Information Services Division NHS National Services Scotland (e.g. <http://www.isdscotland.org/Health-Topics/Drugs-and-Alcohol-Misuse/Publications/2014-02-25/2014-02-25-ARHS2012-13-Report.pdf>) and the National Records of Scotland (e.g. <http://www.gro-scotland.gov.uk/statistics/theme/vital-events/deaths/alcohol-related/coverage-of-stats.html>) at the time of data acquisition, for alcohol-related hospital episodes and alcohol-related deaths respectively.

Any pair of an *external alcohol code*<sup>\*</sup> and *external code*<sup>§</sup> constitutes an alcohol-related episode.

<sup>a</sup>Combination of these codes in consecutive diagnoses listed constitutes an alcohol-related episode.

The protocol for this study is available from: <http://www.sphsu.mrc.ac.uk/publications/reports-and-protocols.html>

**Web Appendix 3: Completeness of key variables for the analytical sample**

|                                                | N (%) with non-missing data (based on available waves) | Non-availability   |
|------------------------------------------------|--------------------------------------------------------|--------------------|
| Highest educational qualification              | 50,168 (99.9)                                          |                    |
| Deprivation quintile                           | 50,089 (99.7)                                          |                    |
| Social class                                   | 47,656 (94.9)                                          |                    |
| Household income                               | 31,075 (88.7)                                          | Not in 1995/1998   |
| Smoking                                        | 49,911 (99.4)                                          |                    |
| BMI                                            | 44,271 (88.1)                                          |                    |
| Current drinking status                        | 49,859 (99.2)                                          |                    |
| Binge drinking (among drinkers)                | 33,859 (89.7)                                          | Not in 1995        |
| <i>Binge drinking (including non-drinkers)</i> | <i>39,168 (91.0)</i>                                   | <i>Not in 1995</i> |

**Web Appendix 4: Diagnostic codes responsible for primary outcome events**

| <b>Category</b>                              | <b>ICD-9 codes</b>                                                                                    | <b>ICD-10 codes</b>                                      | <b>No of events</b> |
|----------------------------------------------|-------------------------------------------------------------------------------------------------------|----------------------------------------------------------|---------------------|
| Mental health and alcohol dependence         | 2910, 2911, 2912, 2913, 2915, 2918, 2919, 3039, D3039+A3317, D3039+A3344, V57, E9473, <i>291, 303</i> | F10, Z50.2, Z71.4, <i>F10</i>                            | 672                 |
| Neurological                                 | 2651, 3575, 3483, 3594, <i>3575</i>                                                                   | G31.2, G62.1, G72.1, <i>G31.2, G62.1</i>                 | 5                   |
| Liver disease                                | 5709, 5710, 5711, 5712, 5713, <i>5710, 5711, 5712, 5713</i>                                           | K70, <i>K70, K73, K74</i>                                | 113                 |
| Other GI                                     | 5353, <i>5353</i>                                                                                     | K29.2, K86.0, <i>K29.2, K86.0</i>                        | 18                  |
| Alcohol detected in blood                    | 7903, <i>7903</i>                                                                                     | R78.0, Y90, Y57.3, Y91, <i>Z72.1</i>                     | 97                  |
| Alcohol poisoning                            | 3050, 9800, 9801, 9809, E860, E9509, E9809, E8600, E8601, E8609, E9509, <i>E8600, E8609, 305</i>      | T51.0, T51.1, T51.9, X45, X65, Y15, <i>X45, X65, Y15</i> | 117                 |
| Maternal and foetal alcohol-related outcomes | 7607, 7598, 6554                                                                                      | O35.4, P04.3, Q86.0                                      | 0                   |
| Cardiovascular                               | 4255, <i>4255</i>                                                                                     | I42.6, <i>I42.6</i>                                      | 0                   |
| Endocrine conditions                         | 2550                                                                                                  | E24.4, E51.2                                             | 0                   |

Codes for deaths indicated using italics.

## **Web Appendix 5: Descriptive tables of alcohol consumption by socioeconomic status**

Table 1: Drinking status by highest educational qualification (in those with complete data)

|                                               | Highest qualification |                     |                      |                              |                    |              |
|-----------------------------------------------|-----------------------|---------------------|----------------------|------------------------------|--------------------|--------------|
|                                               | Degree or higher      | HNC/D or equivalent | Higher or equivalent | Standard grade or equivalent | Other school level | None         |
| <b>Current drinking</b>                       |                       |                     |                      |                              |                    |              |
| Never drinker                                 | 477 ( 4.3)            | 167 ( 3.2)          | 275 ( 4.2)           | 507 ( 4.6)                   | 237 ( 7.6)         | 1,266 (10.0) |
| Ex-drinker                                    | 380 ( 3.4)            | 231 ( 4.4)          | 250 ( 3.9)           | 511 ( 4.6)                   | 290 ( 9.3)         | 1,270 (10.1) |
| Current light drinker                         | 4,924 (43.9)          | 2,460 (46.5)        | 3,017 (46.5)         | 5,386 (48.8)                 | 1,659 (53.1)       | 6,296 (49.9) |
| Current moderate drinker                      | 2,675 (23.8)          | 1,142 (21.6)        | 1,365 (21.0)         | 2,083 (18.9)                 | 506 (16.2)         | 1,970 (15.6) |
| Current heavy drinker                         | 2,387 (21.3)          | 1,089 (20.6)        | 1,278 (19.7)         | 2,026 (18.4)                 | 354 (11.3)         | 1,420 (11.3) |
| Current Excessive drinker                     | 381 ( 3.4)            | 202 ( 3.8)          | 306 ( 4.7)           | 530 ( 4.8)                   | 79 ( 2.5)          | 400 ( 3.2)   |
| <b>Binge drinker (among drinkers)</b>         |                       |                     |                      |                              |                    |              |
| No binge                                      | 7,208 (79.9)          | 2,856 (73.8)        | 3,513 (73.4)         | 5,019 (72.4)                 | 1,968 (88.5)       | 5,811 (83.3) |
| Binge                                         | 1,818 (20.1)          | 1,013 (26.2)        | 1,272 (26.6)         | 1,912 (27.6)                 | 257 (11.6)         | 1,167 (16.7) |
| <b>Binge drinker (including non-drinkers)</b> |                       |                     |                      |                              |                    |              |
| <i>Non-drinker</i>                            | 857 ( 8.7)            | 398 ( 9.3)          | 525 ( 9.9)           | 1,018 (12.8)                 | 527 (19.2)         | 2,536 (26.7) |
| <i>No binge</i>                               | 7,208 (72.9)          | 2,856 (66.9)        | 3,513 (66.2)         | 5,019 (63.1)                 | 1,968 (71.5)       | 5,811 (61.1) |
| <i>Binge</i>                                  | 1,818 (18.4)          | 1,013 (23.7)        | 1,272 (24.0)         | 1,912 (24.1)                 | 257 ( 9.3)         | 1,167 (12.3) |

Table 2: Drinking status by deprivation quintile (in those with complete data)

|                                               | Deprivation quintile |              |              |              |                   |
|-----------------------------------------------|----------------------|--------------|--------------|--------------|-------------------|
|                                               | 1 (Least deprived)   | 2            | 3            | 4            | 5 (Most deprived) |
| <b>Current drinking</b>                       |                      |              |              |              |                   |
| Never drinker                                 | 407 ( 4.5)           | 510 ( 4.9)   | 545 ( 5.2)   | 687 ( 6.9)   | 771 ( 7.8)        |
| Ex-drinker                                    | 289 ( 3.2)           | 470 ( 4.5)   | 625 ( 6.0)   | 695 ( 7.0)   | 852 ( 8.6)        |
| Current light drinker                         | 4,018 (44.7)         | 5,064 (48.4) | 5,084 (48.9) | 4,925 (49.3) | 4,623 (46.7)      |
| Current moderate drinker                      | 2,065 (23.0)         | 2,171 (20.8) | 2,017 (19.4) | 1,734 (17.4) | 1,735 (17.5)      |
| Current heavy drinker                         | 1,885 (21.0)         | 1,867 (17.9) | 1,745 (16.8) | 1,563 (15.7) | 1,473 (14.9)      |
| Current Excessive drinker                     | 324 ( 3.6)           | 377 ( 3.6)   | 380 ( 3.7)   | 378 ( 3.8)   | 437 ( 4.4)        |
| <b>Binge drinker (among drinkers)</b>         |                      |              |              |              |                   |
| No binge                                      | 5,370 (80.1)         | 6,025 (79.5) | 5,714 (79.1) | 4,882 (77.3) | 4,343 (73.2)      |
| Binge                                         | 1,331 (19.9)         | 1,557 (20.5) | 1,508 (20.9) | 1,437 (22.7) | 1,588 (26.8)      |
| <b>Binge drinker (including non-drinkers)</b> |                      |              |              |              |                   |
| <i>Non-drinker</i>                            | 611 ( 8.4)           | 913 (10.8)   | 1,065 (12.9) | 1,248 (16.5) | 1,449 (19.6)      |
| <i>No binge</i>                               | 5,370 (73.2)         | 6,025 (70.9) | 5,714 (69.0) | 4,882 (64.5) | 4,343 (58.9)      |
| <i>Binge</i>                                  | 1,331 (18.2)         | 1,557 (18.3) | 1,508 (18.2) | 1,437 (19.0) | 1,588 (21.5)      |

Table 3: Drinking status by social class (in those with complete data)

|                                               | Social class        |                     |                     |                     |                     |                     |
|-----------------------------------------------|---------------------|---------------------|---------------------|---------------------|---------------------|---------------------|
|                                               | I                   | II                  | IIINM               | IIIM                | IV                  | V                   |
| <b>Current drinking</b>                       |                     |                     |                     |                     |                     |                     |
| Never drinker                                 | 79 ( 3.4)           | 596 ( 4.4)          | 625 ( 5.8)          | 362 ( 4.0)          | 555 ( 6.6)          | 290 ( 9.0)          |
| Ex-drinker                                    | 50 ( 2.2)           | 559 ( 4.1)          | 578 ( 5.4)          | 620 ( 6.8)          | 659 ( 7.8)          | 335 (10.3)          |
| Current light drinker                         | 963 (41.4)          | 6,248 (46.2)        | 5,589 (51.7)        | 3,940 (43.4)        | 4,204 (49.8)        | 1,697 (52.4)        |
| Current moderate drinker                      | 624 (26.8)          | 2,872 (21.2)        | 2,085 (19.3)        | 1,915 (21.1)        | 1,443 (17.1)        | 456 (14.1)          |
| Current heavy drinker                         | 528 (22.7)          | 2,740 (21.2)        | 1,627 (15.1)        | 1,754 (19.3)        | 1,248 (14.8)        | 363 (11.2)          |
| Current Excessive drinker                     | 82 ( 3.5)           | 505 ( 3.7)          | 302 ( 2.8)          | 485 ( 5.3)          | 342 ( 4.1)          | 100 ( 3.1)          |
| <b>Binge drinker (among drinkers)</b>         |                     |                     |                     |                     |                     |                     |
| No binge                                      | 1,473 (79.7)        | 8,092 (79.4)        | 5,848 (80.1)        | 4,367 (72.1)        | 4,233 (77.3)        | 1,450 (81.0)        |
| Binge                                         | 376 (20.3)          | 2,102 (20.6)        | 1,451 (19.9)        | 1,692 (27.9)        | 1,244 (22.7)        | 340 (19.0)          |
| <b>Binge drinker (including non-drinkers)</b> |                     |                     |                     |                     |                     |                     |
| <i>Non-drinker</i>                            | <i>121 ( 6.1)</i>   | <i>1,051 ( 9.4)</i> | <i>1,099 (13.1)</i> | <i>897 (12.9)</i>   | <i>1,106 (16.8)</i> | <i>562 (23.9)</i>   |
| <i>No binge</i>                               | <i>1,473 (74.8)</i> | <i>8,092 (72.0)</i> | <i>5,848 (69.6)</i> | <i>4,367 (62.8)</i> | <i>4,233 (64.3)</i> | <i>1,450 (61.7)</i> |
| <i>Binge</i>                                  | <i>376 (19.1)</i>   | <i>2,102 (18.7)</i> | <i>1,451 (17.3)</i> | <i>1,692 (24.3)</i> | <i>1,244 (18.9)</i> | <i>340 (14.5)</i>   |



Table 4: Drinking status by household income quintile (in those with complete data)

|                                               | Household income quintile |              |              |              |              |
|-----------------------------------------------|---------------------------|--------------|--------------|--------------|--------------|
|                                               | 1 (Highest)               | 2            | 3            | 4            | 5 (Lowest)   |
| <b>Current drinking</b>                       |                           |              |              |              |              |
| Never drinker                                 | 183 ( 2.7)                | 216 ( 3.3)   | 368 ( 6.0)   | 491 ( 7.8)   | 501 (10.2)   |
| Ex-drinker                                    | 186 ( 2.7)                | 278 ( 4.2)   | 413 ( 6.7)   | 558 ( 8.9)   | 590 (12.0)   |
| Current light drinker                         | 2,780 (40.3)              | 3,119 (47.4) | 3,042 (49.5) | 3,244 (51.7) | 2,436 (49.6) |
| Current moderate drinker                      | 1,712 (24.8)              | 1,421 (21.6) | 1,098 (17.9) | 1,025 (16.3) | 638 (13.0)   |
| Current heavy drinker                         | 1,712 (24.8)              | 1,296 (19.7) | 1,006 (16.4) | 784 (12.5)   | 535 (10.9)   |
| Current Excessive drinker                     | 319 ( 4.6)                | 250 ( 3.8)   | 222 ( 3.6)   | 176 ( 2.8)   | 216 ( 4.4)   |
| <b>Binge drinker (among drinkers)</b>         |                           |              |              |              |              |
| No binge                                      | 4,601 (73.0)              | 4,527 (77.5) | 4,037 (79.7) | 4,006 (83.4) | 2,830 (80.4) |
| Binge                                         | 1,699 (27.0)              | 1,312 (22.5) | 1,030 (20.3) | 798 (16.6)   | 689 (19.6)   |
| <b>Binge drinker (including non-drinkers)</b> |                           |              |              |              |              |
| <i>Non-drinker</i>                            | 369 ( 5.5)                | 494 ( 7.8)   | 781 (13.4)   | 1,049 (17.9) | 1,091 (23.7) |
| <i>No binge</i>                               | 4,601 (69.0)              | 4,527 (71.5) | 4,037 (69.0) | 4,006 (68.4) | 2,830 (61.4) |
| <i>Binge</i>                                  | 1,699 (25.5)              | 1,312 (20.7) | 1,030 (17.6) | 798 (13.6)   | 689 (15.0)   |

**Web Appendix 6: Logistic regression models for secondary outcomes**

Table 1: Odds ratio (95% confidence interval) for alcohol admissions/deaths plus prescriptions according to drinking status by socioeconomic status (multiply imputed data)

|                                                         | Higher socioeconomic position |                          | Lower socioeconomic position |                          |
|---------------------------------------------------------|-------------------------------|--------------------------|------------------------------|--------------------------|
|                                                         | n events /<br>Total N         | OR (95% CI) <sup>1</sup> | n events /<br>Total N        | OR (95% CI) <sup>1</sup> |
| <i>By highest educational qualification<sup>2</sup></i> |                               |                          |                              |                          |
| Non-drinker                                             | 19 / 1,780                    | 1.33 (0.81, 2.18)        | 82 / 4,081                   | 1.79 (1.32, 2.34)        |
| Light drinker (ref)                                     | 93 / 10,401                   | 1.00                     | 297 / 13,341                 | 1.73 (1.36, 2.20)        |
| Moderate drinker                                        | 70 / 5,182                    | 1.34 (0.98, 1.84)        | 199 / 4,559                  | 2.95 (2.29, 3.81)        |
| Heavy drinker                                           | 110 / 4,754                   | 2.16 (1.63, 2.87)        | 277 / 3,800                  | 4.84 (3.79, 6.19)        |
| Excessive drinker                                       | 68 / 889                      | 6.15 (4.42, 8.55)        | 164 / 1,009                  | 10.43 (7.91, 13.76)      |
| <i>By deprivation<sup>3</sup></i>                       |                               |                          |                              |                          |
| Non-drinker                                             | 40 / 2,846                    | 1.50 (1.05, 2.14)        | 61 / 3,005                   | 1.75 (1.29, 2.38)        |
| Light drinker (ref)                                     | 144 / 14,166                  | 1.00                     | 246 / 9,548                  | 2.01 (1.62, 2.48)        |
| Moderate drinker                                        | 96 / 6,253                    | 1.37 (2.03, 3.22)        | 173 / 3,469                  | 3.50 (2.78, 4.41)        |
| Heavy drinker                                           | 162 / 5,497                   | 2.56 (2.03, 3.22)        | 224 / 3,036                  | 5.10 (4.09, 6.36)        |
| Excessive drinker                                       | 91 / 1,081                    | 6.75 (5.09, 8.93)        | 141 / 815                    | 11.06 (8.53, 14.35)      |
| <i>By social class<sup>4</sup></i>                      |                               |                          |                              |                          |
| Non-drinker                                             | 26 / 2,487                    | 1.16 (0.76, 1.78)        | 62 / 2,821                   | 1.84 (1.35, 2.52)        |
| Light drinker (ref)                                     | 125 / 12,800                  | 1.00                     | 245 / 9,841                  | 1.94 (1.56, 2.43)        |
| Moderate drinker                                        | 77 / 5,581                    | 1.33 (1.00, 1.78)        | 177 / 3,814                  | 3.31 (2.60, 4.21)        |
| Heavy drinker                                           | 138 / 4,895                   | 2.74 (2.14, 3.51)        | 225 / 3,365                  | 4.60 (3.64, 5.82)        |
| Excessive drinker                                       | 71 / 889                      | 7.06 (5.18, 9.64)        | 153 / 927                    | 11.03 (8.44, 14.42)      |

---

*By income*<sup>5</sup>

|                     |            |                   |            |                     |
|---------------------|------------|-------------------|------------|---------------------|
| Non-drinker         | 15 / 1,644 | 1.18 (0.67, 2.08) | 33 / 2,140 | 1.75 (1.14, 2.67)   |
| Light drinker (ref) | 71 / 8,941 | 1.00              | 98 / 5,680 | 1.83 (1.33, 2.50)   |
| Moderate drinker    | 43 / 4,231 | 1.18 (0.80, 1.73) | 51 / 1,663 | 2.91 (2.01, 4.22)   |
| Heavy drinker       | 74 / 4,014 | 2.02 (1.45, 2.81) | 85 / 1,319 | 6.00 (4.31, 8.34)   |
| Excessive drinker   | 52 / 791   | 6.19 (4.24, 9.02) | 58 / 392   | 12.74 (8.71, 18.65) |

---

<sup>1</sup>Adjusted for age, sex, wave, smoking, BMI and binge drinking in last week; <sup>2</sup>None/other school/standard grade (lower socioeconomic status) versus Higher/HNC/HND/Degree or higher (higher socioeconomic status); <sup>3</sup>Most deprived two quintiles versus least deprived three quintiles; <sup>4</sup>Manual versus non-manual occupations; <sup>5</sup>Lowest two quintiles versus highest three quintiles

Table 2: Odds ratio (95% confidence interval) for alcohol admissions/deaths plus extended alcohol-related prescriptions (including diazepam and thiamine) according to drinking status by socioeconomic position (multiply imputed data)

|                                                         | Higher socioeconomic position |                          | Lower socioeconomic position |                          |
|---------------------------------------------------------|-------------------------------|--------------------------|------------------------------|--------------------------|
|                                                         | n events /<br>Total N         | OR (95% CI) <sup>1</sup> | n events /<br>Total N        | OR (95% CI) <sup>1</sup> |
| <i>By highest educational qualification<sup>2</sup></i> |                               |                          |                              |                          |
| Non-drinker                                             | 262 / 1,780                   | 1.08 (0.94, 1.25)        | 874 / 4,081                  | 1.55 (1.40, 1.71)        |
| Light drinker (ref)                                     | 1,447 / 10,401                | 1.00                     | 2,529 / 13,341               | 1.28 (1.19, 1.38)        |
| Moderate drinker                                        | 626 / 5,182                   | 0.89 (0.80, 0.98)        | 874 / 4,559                  | 1.33 (1.21, 1.46)        |
| Heavy drinker                                           | 629 / 4,754                   | 0.95 (0.86, 1.06)        | 828 / 3,800                  | 1.59 (1.44, 1.76)        |
| Excessive drinker                                       | 147 / 889                     | 1.19 (0.98, 1.43)        | 305 / 1,009                  | 2.47 (2.12, 2.87)        |
| <i>By deprivation<sup>3</sup></i>                       |                               |                          |                              |                          |
| Non-drinker                                             | 477 / 2,846                   | 1.17 (1.05, 1.30)        | 658 / 3,005                  | 1.44 (1.30, 1.60)        |
| Light drinker (ref)                                     | 2,092 / 14,166                | 1.00                     | 1,889 / 9,548                | 1.23 (1.15, 1.32)        |
| Moderate drinker                                        | 821 / 6,253                   | 0.90 (0.83, 0.99)        | 679 / 3,469                  | 1.29 (1.17, 1.42)        |
| Heavy drinker                                           | 803 / 5,497                   | 1.00 (0.92, 1.10)        | 653 / 3,036                  | 1.49 (1.35, 1.65)        |
| Excessive drinker                                       | 213 / 1,081                   | 1.45 (1.23, 1.70)        | 239 / 815                    | 2.14 (1.82, 2.52)        |
| <i>By social class<sup>4</sup></i>                      |                               |                          |                              |                          |
| Non-drinker                                             | 411 / 2,487                   | 1.11 (0.99, 1.25)        | 626 / 2,821                  | 1.53 (1.37, 1.69)        |
| Light drinker (ref)                                     | 1,954 / 12,800                | 1.00                     | 1,840 / 9,841                | 1.25 (1.16, 1.34)        |
| Moderate drinker                                        | 784 / 5,581                   | 0.95 (0.87, 1.04)        | 664 / 3,814                  | 1.23 (1.12, 1.36)        |
| Heavy drinker                                           | 743 / 4,895                   | 1.03 (0.94, 1.13)        | 656 / 3,365                  | 1.45 (1.30, 1.60)        |
| Excessive drinker                                       | 170 / 889                     | 1.31 (1.09, 1.56)        | 266 / 927                    | 2.35 (2.00, 2.75)        |
| <i>By income<sup>5</sup></i>                            |                               |                          |                              |                          |

|                     |               |                   |               |                   |
|---------------------|---------------|-------------------|---------------|-------------------|
| Non-drinker         | 282 / 1,644   | 1.23 (1.07, 1.42) | 439 / 2,140   | 1.44 (1.27, 1.63) |
| Light drinker (ref) | 1,291 / 8,941 | 1.00              | 1,077 / 5,680 | 1.28 (1.17, 1.41) |
| Moderate drinker    | 543 / 4,231   | 0.91 (0.82, 1.02) | 289 / 1,663   | 1.21 (1.05, 1.40) |
| Heavy drinker       | 526 / 4,014   | 0.90 (0.81, 1.01) | 287 / 1,319   | 1.59 (1.37, 1.84) |
| Excessive drinker   | 142 / 791     | 1.28 (1.06, 1.56) | 125 / 392     | 2.56 (2.04, 3.22) |

<sup>1</sup>Adjusted for age, sex, wave, smoking, BMI and binge drinking in last week; <sup>2</sup>None/other school/standard grade (lower socioeconomic status) versus Higher/HNC/HND/Degree or higher (higher socioeconomic status); <sup>3</sup>Most deprived two quintiles versus least deprived three quintiles; <sup>4</sup>Manual versus non-manual occupations; <sup>5</sup>Lowest two quintiles versus highest three quintiles

**Web Appendix 7: Assessing effect modification on a multiplicative scale**

Hazard ratio (95% confidence interval) for alcohol admissions/deaths according to drinking status by socioeconomic position (multiply imputed data)

|                                                          | Lower socioeconomic position |                          | Higher socioeconomic position |                          | <i>p</i> <sup>1</sup> |
|----------------------------------------------------------|------------------------------|--------------------------|-------------------------------|--------------------------|-----------------------|
|                                                          | N events /<br>person years   | HR (95% CI) <sup>2</sup> | N events /<br>person years    | HR (95% CI) <sup>2</sup> |                       |
| <i>By highest educational qualification</i> <sup>3</sup> |                              |                          |                               |                          |                       |
| Non-drinker                                              | 49 / 32,542.4                | 0.94 (0.68, 1.28)        | 7 / 11,698.3                  | 0.72 (0.33, 1.57)        |                       |
| Light drinker (ref)                                      | 203 / 126,202.8              | 1.00                     | 63 / 80,831.6                 | 1.00                     |                       |
| Moderate drinker                                         | 153 / 45,262.5               | 1.78 (1.44, 2.20)        | 50 / 41,951.7                 | 1.43 (0.99, 2.08)        |                       |
| Heavy drinker                                            | 218 / 36,101.3               | 2.86 (2.34, 3.48)        | 87 / 36,814.7                 | 2.53 (1.82, 3.53)        |                       |
| Excessive drinker                                        | 132 / 8,537.1                | 5.92 (4.69, 7.48)        | 33 / 6,656.6                  | 5.28 (3.52, 7.93)        |                       |
| <i>P</i> <sup>4</sup>                                    |                              | <0.001                   |                               | <0.001                   | <b>0.98</b>           |
| <i>By deprivation</i> <sup>5</sup>                       |                              |                          |                               |                          |                       |
| Non-drinker                                              | 34 / 23,206.4                | 0.76 (0.52, 1.10)        | 22 / 20,973.8                 | 1.16 (0.73, 1.84)        |                       |
| Light drinker (ref)                                      | 163 / 87,277.7               | 1.00                     | 103 / 119,676.7               | 1.00                     |                       |
| Moderate drinker                                         | 130 / 32,487.0               | 1.85 (1.47, 2.34)        | 73 / 54,588.6                 | 1.43 (1.05, 1.93)        |                       |
| Heavy drinker                                            | 174 / 27,707.3               | 2.69 (2.15, 3.37)        | 130 / 45,090.2                | 2.79 (2.14, 3.64)        |                       |
| Excessive drinker                                        | 112 / 6,798.9                | 5.50 (4.25, 7.11)        | 64 / 8,387.2                  | 6.08 (4.38, 8.44)        |                       |
| <i>P</i> <sup>4</sup>                                    |                              | <0.001                   |                               | <0.001                   | <b>0.42</b>           |

| <i>By occupational class<sup>6</sup></i> |                |                   |                |                    |             |
|------------------------------------------|----------------|-------------------|----------------|--------------------|-------------|
| Non-drinker                              | 35 / 21,656.7  | 0.77 (0.53, 1.11) | 10 / 17,862.5  | 0.76 (0.39, 1.47)  |             |
| Light drinker (ref)                      | 172 / 86,639.2 | 1.00              | 76 / 109,125.4 | 1.00               |             |
| Moderate drinker                         | 134 / 34,855.9 | 1.71 (1.36, 2.15) | 58 / 48,320.2  | 1.65 (1.17, 2.33)  |             |
| Heavy drinker                            | 179 / 30,725.0 | 2.45 (1.97, 3.05) | 109 / 39,095.6 | 3.56 (2.63, 4.80)  |             |
| Excessive drinker                        | 119 / 7,910.4  | 5.33 (4.15, 6.84) | 49 / 6,492.7   | 7.39 (5.06, 10.79) |             |
| <i>P<sup>4</sup></i>                     |                | <0.001            |                | <0.001             | <b>0.20</b> |
| <i>By income<sup>7</sup></i>             |                |                   |                |                    |             |
| Non-drinker                              | 14 / 10,543.2  | 0.73 (0.41, 1.31) | 5 / 7,817.9    | 0.50 (0.20, 1.27)  |             |
| Light drinker (ref)                      | 58 / 30,082.4  | 1.00              | 49 / 45,393.6  | 1.00               |             |
| Moderate drinker                         | 29 / 8,664.1   | 1.42 (0.90, 2.23) | 28 / 22,230.7  | 1.14 (0.71, 1.83)  |             |
| Heavy drinker                            | 58 / 6,584.3   | 3.39 (2.33, 4.93) | 51 / 20,319.4  | 2.12 (1.42, 3.17)  |             |
| Excessive drinker                        | 31 / 1,892.9   | 5.38 (3.41, 8.48) | 34 / 3,770.8   | 5.85 (3.68, 9.29)  |             |
| <i>P<sup>4</sup></i>                     |                | <0.001            |                | <0.001             | <b>0.45</b> |

<sup>1</sup>p for interaction between lower and higher socioeconomic position from case-complete model; <sup>2</sup>Adjusted for age, sex, wave, smoking, BMI and binge drinking in last week; <sup>3</sup>None/other school/standard grade (lower socioeconomic position) versus Higher/HNC/HND/Degree or higher (higher socioeconomic position); <sup>4</sup>p for linear trend across drinking categories; <sup>5</sup>Most deprived two quintiles versus least deprived three quintiles; <sup>6</sup>Manual versus non-manual occupations; <sup>7</sup>Lowest two quintiles versus highest three quintiles

**Web Appendix 8: Complete case analyses**

Table 1: Hazard ratio (95% confidence interval) for alcohol admissions according to socioeconomic position (sample limited to complete cases)

|                                          | N events / person years | Adjusted for age, sex and data collection wave | Adjusted for age, sex, wave, alcohol consumption and binge drinking | Adjusted for age, sex, wave, alcohol, binge drinking, BMI and smoking status |
|------------------------------------------|-------------------------|------------------------------------------------|---------------------------------------------------------------------|------------------------------------------------------------------------------|
| <b>Highest educational qualification</b> |                         |                                                |                                                                     |                                                                              |
| None                                     | 203 / 54,820.2          | 1.00                                           | 1.00                                                                | 1.00                                                                         |
| Other school                             | 35 / 12,398.8           | 0.74 (0.42, 1.30)                              | 0.82 (0.57, 1.18)                                                   | 0.90 (0.62, 1.30)                                                            |
| Standard grade                           | 137 / 49,327.4          | 0.94 (0.63, 1.43)                              | 0.67 (0.53, 0.84)                                                   | 0.76 (0.60, 0.96)                                                            |
| Higher                                   | 54 / 27,800.2           | 0.54 (0.33, 0.91)                              | 0.51 (0.37, 0.70)                                                   | 0.66 (0.48, 0.90)                                                            |
| HNC/HND                                  | 42 / 25,336.4           | 0.50 (0.28, 0.91)                              | 0.39 (0.28, 0.55)                                                   | 0.49 (0.34, 0.69)                                                            |
| Degree or higher                         | 55 / 50,958.5           | 0.34 (0.21, 0.54)                              | 0.27 (0.20, 0.37)                                                   | 0.38 (0.28, 0.52)                                                            |
| <i>p</i> <sup>1</sup>                    |                         | <0.001                                         | <0.001                                                              | <0.001                                                                       |
| <b>Deprivation</b>                       |                         |                                                |                                                                     |                                                                              |
| 1 Most deprived quintile                 | 180 / 40,743.2          | 1.00                                           | 1.00                                                                | 1.00                                                                         |
| 2                                        | 137 / 43,275.9          | 0.70 (0.56, 0.88)                              | 0.71 (0.57, 0.89)                                                   | 0.79 (0.64, 0.99)                                                            |
| 3                                        | 91 / 46,688.9           | 0.43 (0.33, 0.55)                              | 0.44 (0.34, 0.57)                                                   | 0.53 (0.41, 0.68)                                                            |
| 4                                        | 68 / 47,366.9           | 0.31 (0.24, 0.41)                              | 0.33 (0.25, 0.43)                                                   | 0.42 (0.31, 0.56)                                                            |
| 5 Least deprived quintile                | 50 / 42,273.9           | 0.25 (0.19, 0.35)                              | 0.26 (0.19, 0.36)                                                   | 0.37 (0.26, 0.50)                                                            |
| <i>p</i> <sup>1</sup>                    |                         | <0.001                                         | <0.001                                                              | <0.001                                                                       |



---

|                            |                |                   |                   |                   |
|----------------------------|----------------|-------------------|-------------------|-------------------|
| Social class               |                |                   |                   |                   |
| V (unskilled)              | 63 / 13,370.3  | 1.00              | 1.00              | 1.00              |
| IV (partly skilled)        | 140 / 36,077.0 | 0.78 (0.58, 1.05) | 0.74 (0.55, 1.00) | 0.76 (0.56, 1.03) |
| IIIM (skilled manual)      | 129 / 40,866.5 | 0.46 (0.34, 0.63) | 0.44 (0.32, 0.60) | 0.49 (0.36, 0.66) |
| IIINM (skilled non-manual) | 68 / 47,602.0  | 0.35 (0.25, 0.50) | 0.34 (0.24, 0.49) | 0.42 (0.30, 0.60) |
| II (Intermediate)          | 90 / 62,442.3  | 0.28 (0.20, 0.38) | 0.25 (0.18, 0.35) | 0.33 (0.24, 0.47) |
| I (Professional)           | 15 / 11,097.9  | 0.22 (0.12, 0.38) | 0.22 (0.12, 0.39) | 0.31 (0.18, 0.56) |
| $p^1$                      |                | <0.001            | <0.001            | <0.001            |
| Income                     |                |                   |                   |                   |
| 1 Lowest quintile          | 83 / 18,074.4  | 1.00              | 1.00              | 1.00              |
| 2                          | 65 / 24,838.5  | 0.55 (0.40, 0.77) | 0.56 (0.40, 0.78) | 0.60 (0.43, 0.84) |
| 3                          | 56 / 24,138.0  | 0.47 (0.33, 0.66) | 0.46 (0.32, 0.64) | 0.54 (0.38, 0.76) |
| 4                          | 45 / 27,369.8  | 0.32 (0.22, 0.46) | 0.31 (0.21, 0.44) | 0.39 (0.27, 0.56) |
| 5 Highest quintile         | 30 / 29,377.4  | 0.19 (0.12, 0.29) | 0.17 (0.11, 0.26) | 0.24 (0.15, 0.36) |
| $p^1$                      |                | <0.001            | <0.001            | <0.001            |

---

<sup>1</sup>p for linear trend across socioeconomic status categories

Table 2: Odds ratio (95% confidence interval) for alcohol admissions, deaths and/or prescriptions according to socioeconomic position (sample limited to complete cases)

|                                          | n (%) events / N  | Adjusted for age, sex and data collection wave | Adjusted for age, sex, wave, alcohol consumption and binge drinking | Adjusted for age, sex, wave, alcohol, binge drinking, BMI and smoking status |
|------------------------------------------|-------------------|------------------------------------------------|---------------------------------------------------------------------|------------------------------------------------------------------------------|
| <b>Highest educational qualification</b> |                   |                                                |                                                                     |                                                                              |
| None                                     | 290 (3.7) / 7,782 | 1.00                                           | 1.00                                                                | 1.00                                                                         |
| Other school                             | 51 (2.2) / 2,293  | 0.77 (0.56, 1.04)                              | 0.74 (0.54, 1.01)                                                   | 0.82 (0.60, 1.13)                                                            |
| Standard grade                           | 195 (2.9) / 6,786 | 0.67 (0.55, 0.81)                              | 0.64 (0.52, 0.79)                                                   | 0.73 (0.60, 0.90)                                                            |
| Higher                                   | 74 (1.6) / 4,605  | 0.43 (0.33, 0.57)                              | 0.42 (0.32, 0.55)                                                   | 0.55 (0.41, 0.72)                                                            |
| HNC/HND                                  | 69 (1.9) / 3,730  | 0.42 (0.32, 0.56)                              | 0.42 (0.32, 0.55)                                                   | 0.53 (0.40, 0.70)                                                            |
| Degree or higher                         | 90 (1.0) / 8,653  | 0.28 (0.22, 0.35)                              | 0.27 (0.21, 0.35)                                                   | 0.39 (0.30, 0.51)                                                            |
| <i>p</i> <sup>1</sup>                    |                   | <0.001                                         | <0.001                                                              | <0.001                                                                       |
| <b>Deprivation</b>                       |                   |                                                |                                                                     |                                                                              |
| 1 Most deprived quintile                 | 269 (4.3) / 6,221 | 1.00                                           | 1.00                                                                | 1.00                                                                         |
| 2                                        | 194 (3.0) / 6,497 | 0.66 (0.55, 0.80)                              | 0.67 (0.55, 0.82)                                                   | 0.76 (0.62, 0.92)                                                            |
| 3                                        | 138 (1.9) / 7,211 | 0.42 (0.34, 0.52)                              | 0.42 (0.34, 0.52)                                                   | 0.51 (0.41, 0.63)                                                            |
| 4                                        | 102 (1.4) / 7,449 | 0.30 (0.24, 0.38)                              | 0.31 (0.24, 0.39)                                                   | 0.40 (0.32, 0.51)                                                            |
| 5 Least deprived quintile                | 66 (1.0) / 6,419  | 0.22 (0.17, 0.29)                              | 0.22 (0.17, 0.29)                                                   | 0.31 (0.23, 0.41)                                                            |
| <i>p</i> <sup>1</sup>                    |                   | <0.001                                         | <0.001                                                              | <0.001                                                                       |

---

|                            |                   |                   |                   |                   |
|----------------------------|-------------------|-------------------|-------------------|-------------------|
| <b>Social class</b>        |                   |                   |                   |                   |
| V (unskilled)              | 101 (5.0) / 2,029 | 1.00              | 1.00              | 1.00              |
| IV (partly skilled)        | 193 (3.4) / 5,677 | 0.66 (0.51, 0.85) | 0.64 (0.49, 0.82) | 0.66 (0.51, 0.85) |
| IIIM (skilled manual)      | 178 (3.0) / 6,039 | 0.43 (0.33, 0.56) | 0.41 (0.31, 0.53) | 0.45 (0.34, 0.59) |
| IIINM (skilled non-manual) | 111 (1.5) / 7,226 | 0.33 (0.25, 0.44) | 0.32 (0.24, 0.43) | 0.41 (0.31, 0.54) |
| II (Intermediate)          | 135 (1.4) / 9,836 | 0.25 (0.19, 0.33) | 0.23 (0.18, 0.31) | 0.32 (0.24, 0.42) |
| I (Professional)           | 22 (1.3) / 1,750  | 0.20 (0.13, 0.32) | 0.20 (0.13, 0.33) | 0.30 (0.19, 0.49) |
| <i>p</i> <sup>1</sup>      |                   | <0.001            | <0.001            | <0.001            |
| <br><b>Income</b>          |                   |                   |                   |                   |
| 1 Lowest quintile          | 142 (3.7) / 3,891 | 1.00              | 1.00              | 1.00              |
| 2                          | 113 (2.2) / 5,059 | 0.58 (0.45, 0.75) | 0.59 (0.45, 0.76) | 0.64 (0.49, 0.84) |
| 3                          | 97 (1.9) / 5,032  | 0.47 (0.36, 0.62) | 0.45 (0.35, 0.59) | 0.54 (0.41, 0.71) |
| 4                          | 62 (1.1) / 5,676  | 0.25 (0.19, 0.34) | 0.24 (0.18, 0.33) | 0.31 (0.23, 0.43) |
| 5 Highest quintile         | 51 ( 0.9) / 5,938 | 0.19 (0.14, 0.26) | 0.16 (0.12, 0.23) | 0.23 (0.16, 0.32) |
| <i>p</i> <sup>1</sup>      |                   | <0.001            | <0.001            | <0.001            |

---

<sup>1</sup>p for linear trend across socioeconomic status categories

Table 3: Odds ratio (95% confidence interval) for alcohol admissions/deaths plus prescriptions according to drinking status by socioeconomic status (sample limited to complete cases)

|                                                         | Higher socioeconomic position |                          | Lower socioeconomic position |                          |
|---------------------------------------------------------|-------------------------------|--------------------------|------------------------------|--------------------------|
|                                                         | n events /<br>Total N         | OR (95% CI) <sup>1</sup> | n events /<br>Total N        | OR (95% CI) <sup>1</sup> |
| <i>By highest educational qualification<sup>2</sup></i> |                               |                          |                              |                          |
| Non-drinker                                             | 14 / 1,359                    | 1.44 (0.79, 2.61)        | 49 / 2,866                   | 1.72 (1.14, 2.58)        |
| Light drinker (ref)                                     | 50 / 7,216                    | 1.00                     | 127 / 7,558                  | 1.80 (1.29, 2.52)        |
| Moderate drinker                                        | 49 / 4,019                    | 1.47 (0.99, 2.19)        | 103 / 3,094                  | 2.79 (1.97, 3.95)        |
| Heavy drinker                                           | 71 / 3,702                    | 2.17 (1.51, 3.14)        | 166 / 2,643                  | 4.95 (3.56, 6.89)        |
| Excessive drinker                                       | 49 / 692                      | 6.77 (4.48, 10.22)       | 91 / 700                     | 9.69 (6.70, 14.04)       |
| <i>By deprivation<sup>3</sup></i>                       |                               |                          |                              |                          |
| Non-drinker                                             | 28 / 2,094                    | 1.64 (1.05, 2.57)        | 35 / 2,128                   | 1.71 (1.13, 2.60)        |
| Light drinker (ref)                                     | 68 / 9,287                    | 1.00                     | 109 / 5,472                  | 2.30 (1.69, 3.13)        |
| Moderate drinker                                        | 56 / 4,680                    | 1.38 (0.97, 1.98)        | 96 / 2,417                   | 3.65 (2.65, 5.03)        |
| Heavy drinker                                           | 95 / 4,187                    | 2.48 (1.80, 3.41)        | 142 / 2,143                  | 5.90 (4.36, 8.00)        |
| Excessive drinker                                       | 59 / 831                      | 6.97 (4.83, 10.07)       | 81 / 558                     | 11.75 (8.25, 16.73)      |
| <i>By social class<sup>4</sup></i>                      |                               |                          |                              |                          |
| Non-drinker                                             | 18 / 1,805                    | 1.26 (0.74, 2.15)        | 38 / 2,057                   | 1.72 (1.13, 2.60)        |
| Light drinker (ref)                                     | 60 / 8,292                    | 1.00                     | 111 / 5,961                  | 2.00 (1.45, 2.76)        |
| Moderate drinker                                        | 50 / 4,199                    | 1.43 (0.97, 2.08)        | 97 / 2,712                   | 3.16 (2.26, 4.42)        |
| Heavy drinker                                           | 91 / 3,808                    | 2.79 (2.00, 3.89)        | 137 / 2,376                  | 4.73 (3.43, 6.53)        |
| Excessive drinker                                       | 49 / 708                      | 7.09 (4.77, 10.54)       | 89 / 639                     | 11.02 (7.67, 15.82)      |
| <i>By income<sup>5</sup></i>                            |                               |                          |                              |                          |

|                     |            |                   |            |                     |
|---------------------|------------|-------------------|------------|---------------------|
| Non-drinker         | 13 / 1,347 | 1.26 (0.68, 2.33) | 24 / 1,728 | 1.58 (0.96, 2.59)   |
| Light drinker (ref) | 53 / 7,262 | 1.00              | 71 / 4,300 | 1.99 (1.38, 2.86)   |
| Moderate drinker    | 40 / 3,787 | 1.28 (0.85, 1.94) | 39 / 1,427 | 2.73 (1.78, 4.18)   |
| Heavy drinker       | 63 / 3,555 | 2.04 (1.41, 2.96) | 72 / 1,162 | 6.02 (4.15, 8.71)   |
| Excessive drinker   | 41 / 695   | 5.79 (3.78, 8.88) | 49 / 333   | 13.20 (8.64, 20.17) |

<sup>1</sup>Adjusted for age, sex, wave, smoking, BMI and binge drinking in last week; <sup>2</sup>None/other school/standard grade (lower socioeconomic status) versus Higher/HNC/HND/Degree or higher (higher socioeconomic status); <sup>3</sup>Most deprived two quintiles versus least deprived three quintiles; <sup>4</sup>Manual versus non-manual occupations; <sup>5</sup>Lowest two quintiles versus highest three quintiles

**Web Appendix 9: Assessment of potential selection bias by repeating main analysis for 72% subsample with repeated area-based deprivation measures**

Hazard ratio (95% confidence interval) for alcohol admissions/deaths according to socioeconomic position (restricted to those with deprivation measured during follow-up)

|                                          | N events / person years | Adjusted for age, sex and data collection wave | Adjusted for age, sex, wave, alcohol consumption and binge drinking | Adjusted for age, sex, wave, alcohol, binge drinking, BMI and smoking status |
|------------------------------------------|-------------------------|------------------------------------------------|---------------------------------------------------------------------|------------------------------------------------------------------------------|
| <b>Highest educational qualification</b> |                         |                                                |                                                                     |                                                                              |
| Degree or higher                         | 85 / 60,894.3           | 1.00                                           | 1.00                                                                | 1.00                                                                         |
| HNC/HND                                  | 82 / 35,679.3           | 1.63 (1.21, 2.22)                              | 1.42 (0.99, 2.05)                                                   | 1.28 (0.88, 1.84)                                                            |
| Higher                                   | 89 / 39,258.3           | 1.74 (1.29, 2.35)                              | 1.66 (1.17, 2.36)                                                   | 1.53 (1.08, 2.16)                                                            |
| Standard grade                           | 296 / 91,181.2          | 2.56 (2.01, 3.27)                              | 2.33 (1.75, 3.10)                                                   | 1.93 (1.45, 2.58)                                                            |
| Other school                             | 51 / 16,621.9           | 2.66 (1.87, 3.80)                              | 2.49 (1.68, 3.73)                                                   | 1.96 (1.31, 2.95)                                                            |
| None                                     | 419 / 103,000.9         | 3.66 (2.88, 4.65)                              | 3.37 (2.56, 4.44)                                                   | 2.48 (1.87, 3.28)                                                            |
| <i>p</i> <sup>1</sup>                    |                         | <0.001                                         | <0.001                                                              | <0.001                                                                       |
| <b>Deprivation</b>                       |                         |                                                |                                                                     |                                                                              |
| 5 Least deprived quintile                | 93 / 59,260.3           | 1.00                                           | 1.00                                                                | 1.00                                                                         |
| 4                                        | 142 / 68,251.6          | 1.32 (1.02, 1.72)                              | 1.32 (0.94, 1.83)                                                   | 1.22 (0.88, 1.70)                                                            |
| 3                                        | 166 / 71,252.1          | 1.52 (1.18, 1.96)                              | 1.67 (1.22, 2.29)                                                   | 1.45 (1.05, 1.99)                                                            |
| 2                                        | 243 / 73,240.0          | 2.25 (1.77, 2.86)                              | 2.54 (1.88, 3.43)                                                   | 2.05 (1.51, 2.78)                                                            |
| 1 Most deprived quintile                 | 377 / 74,148.2          | 3.47 (2.76, 4.35)                              | 3.50 (2.62, 4.68)                                                   | 2.53 (1.88, 3.41)                                                            |
| <i>p</i> <sup>1</sup>                    |                         | <0.001                                         | <0.001                                                              | <0.001                                                                       |

---

|                            |                |                   |                   |                   |
|----------------------------|----------------|-------------------|-------------------|-------------------|
| Social class               |                |                   |                   |                   |
| I (Professional)           | 21 / 14,338.1  | 1.00              | 1.00              | 1.00              |
| II (Intermediate)          | 153 / 85,220.2 | 1.50 (0.95, 2.38) | 1.29 (0.77, 2.15) | 1.18 (0.71, 1.97) |
| IIINM (skilled non-manual) | 132 / 76,034.0 | 1.91 (1.20, 3.04) | 1.52 (0.89, 2.58) | 1.30 (0.76, 2.23) |
| IIIM (skilled manual)      | 262 / 66,773.2 | 2.66 (1.71, 4.15) | 2.14 (1.29, 3.53) | 1.65 (1.00, 2.74) |
| IV (partly skilled)        | 255 / 58,332.1 | 3.94 (2.52, 6.15) | 3.37 (2.04, 5.57) | 2.42 (1.46, 4.02) |
| V (unskilled)              | 129 / 25,507.8 | 4.98 (3.13, 7.93) | 4.16 (2.44, 7.11) | 2.95 (1.72, 5.08) |
| $p^1$                      |                | <0.001            | <0.001            | <0.001            |
| Income                     |                |                   |                   |                   |
| 5 Highest quintile         | 41 / 22,949.7  | 1.00              | 1.00              | 1.00              |
| 4                          | 56 / 21,782.5  | 1.50 (1.00, 2.25) | 1.54 (1.02, 2.34) | 1.42 (0.93, 2.15) |
| 3                          | 72 / 21,434.1  | 2.13 (1.45, 3.13) | 2.26 (1.52, 3.47) | 1.95 (1.30, 2.91) |
| 2                          | 80 / 24,609.7  | 2.24 (1.52, 3.29) | 2.65 (1.78, 3.94) | 2.10 (1.41, 3.15) |
| 1 Lowest quintile          | 110 / 18,545.5 | 4.00 (2.78, 3.73) | 4.31 (2.95, 6.31) | 3.23 (2.19, 4.76) |
| $p^1$                      |                | <0.001            | <0.001            | <0.001            |

---

<sup>1</sup>p for linear trend across socioeconomic status categories

### **Web Appendix 10: Robustness analyses to test social selection hypothesis**

Table 1: Difference in area-based deprivation quintile between baseline and follow-up (first hospital admission, prescription or death) by drinking status at baseline for respondents interviewed from 2008 onwards

| Difference in SIMD quintile                                                                           | Baseline drinking status    |                                     |                                      |
|-------------------------------------------------------------------------------------------------------|-----------------------------|-------------------------------------|--------------------------------------|
|                                                                                                       | Non/ex drinker<br>(N=1,916) | Light/moderate drinker<br>(N=7,285) | Heavy/excessive drinker<br>(N=2,198) |
| -4 (biggest negative (downward) difference)                                                           | 1 ( 0.1)                    | 4 ( 0.1)                            | 3 ( 0.1)                             |
| -3                                                                                                    | 2 ( 0.1)                    | 22 ( 0.3)                           | 11 ( 0.5)                            |
| -2                                                                                                    | 11 ( 0.6)                   | 57 ( 0.8)                           | 25 ( 1.1)                            |
| -1                                                                                                    | 51 ( 2.7)                   | 267 ( 3.7)                          | 87 ( 4.0)                            |
| 0 (no difference)                                                                                     | 1,782 (93.0)                | 6,604 (90.7)                        | 1,963 (89.3)                         |
| 1                                                                                                     | 49 ( 2.6)                   | 208 ( 2.9)                          | 76 ( 3.5)                            |
| 2                                                                                                     | 11 ( 0.6)                   | 74 ( 1.0)                           | 19 ( 0.9)                            |
| 3                                                                                                     | 5 ( 0.3)                    | 43 ( 0.6)                           | 10 ( 0.5)                            |
| 4 (biggest positive (upward) difference)                                                              | 4 ( 0.2)                    | 6 ( 0.1)                            | 4 ( 0.2)                             |
| Negative difference                                                                                   | 65 ( 3.4)                   | 350 ( 4.8)                          | 126 ( 5.7)                           |
| No difference                                                                                         | 1,782 (93.0)                | 6,604 (90.7)                        | 1,963 (89.3)                         |
| Positive difference                                                                                   | 69 ( 3.6)                   | 331 ( 4.5)                          | 109 ( 5.0)                           |
| Mean difference relative to non-drinkers                                                              |                             |                                     |                                      |
| adjusted for baseline deprivation quintile                                                            | 0.00                        | 0.02 (-0.00, 0.05)                  | 0.02 (-0.01, 0.05)                   |
| adjusted for baseline deprivation quintile, age and sex                                               | 0.00                        | 0.02 (-0.01, 0.04)                  | 0.01 (-0.02, 0.04)                   |
| adjusted for baseline deprivation quintile, age, sex and time<br>from interview to prescription       | 0.00                        | 0.01 (-0.01, 0.04)                  | 0.01 (-0.02, 0.04)                   |
| adjusted for baseline deprivation quintile, age, sex, time<br>from interview to prescription and wave | 0.00                        | 0.01 (-0.01, 0.04)                  | 0.01 (-0.02, 0.04)                   |



Table 2: Difference in area-based deprivation quintile between baseline and follow up (hospital admission, prescription but excluding death) by drinking status at baseline

| Difference in SIMD quintile                                                                           | Baseline drinking status    |                                      |                                      |
|-------------------------------------------------------------------------------------------------------|-----------------------------|--------------------------------------|--------------------------------------|
|                                                                                                       | Non/ex drinker<br>(N=2,753) | Light/moderate drinker<br>(N=15,853) | Heavy/excessive drinker<br>(N=4,700) |
| -4 (biggest negative (downward) difference)                                                           | 8 ( 0.3)                    | 43 ( 0.3)                            | 16 ( 0.3)                            |
| -3                                                                                                    | 13 ( 0.5)                   | 135 ( 0.9)                           | 41 ( 0.9)                            |
| -2                                                                                                    | 33 ( 1.2)                   | 301 ( 1.9)                           | 121 ( 2.6)                           |
| -1                                                                                                    | 92 ( 3.3)                   | 670 ( 4.2)                           | 203 ( 4.3)                           |
| 0 (no difference)                                                                                     | 2,451 (89.0)                | 13,532 (85.4)                        | 3,888 (82.7)                         |
| 1                                                                                                     | 103 ( 3.7)                  | 628 ( 4.0)                           | 235 ( 5.0)                           |
| 2                                                                                                     | 34 ( 1.2)                   | 333 ( 2.1)                           | 117 ( 2.5)                           |
| 3                                                                                                     | 13 ( 0.5)                   | 176 ( 1.1)                           | 60 ( 1.3)                            |
| 4 (biggest positive (upward) difference)                                                              | 6 ( 0.2)                    | 35 ( 0.2)                            | 19 ( 0.4)                            |
| Negative difference                                                                                   | 146 ( 5.3)                  | 1,149 ( 7.2)                         | 381 ( 8.1)                           |
| No difference                                                                                         | 2,451 (89.0)                | 13,532 (85.4)                        | 3,888 (82.7)                         |
| Positive difference                                                                                   | 156 ( 5.7)                  | 1,172 ( 7.4)                         | 431 ( 9.2)                           |
| Mean difference relative to non-drinkers                                                              |                             |                                      |                                      |
| adjusted for baseline deprivation quintile                                                            | 0.00                        | 0.05 (0.03, 0.08)                    | 0.08 (0.04, 0.11)                    |
| adjusted for baseline deprivation quintile, age and sex                                               | 0.00                        | 0.05 (0.02, 0.08)                    | 0.07 (0.04, 0.10)                    |
| adjusted for baseline deprivation quintile, age, sex and time<br>from interview to prescription       | 0.00                        | 0.05 (0.02, 0.08)                    | 0.07 (0.04, 0.10)                    |
| adjusted for baseline deprivation quintile, age, sex, time<br>from interview to prescription and wave | 0.00                        | 0.05 (0.02, 0.08)                    | 0.07 (0.04, 0.10)                    |

Table 3: Difference in area-based deprivation quintile between baseline and follow up (hospital admission, prescription but excluding death) by drinking status at baseline for participants from 2008 onwards

| Difference in SIMD quintile                                                                           | Baseline drinking status    |                                     |                                      |
|-------------------------------------------------------------------------------------------------------|-----------------------------|-------------------------------------|--------------------------------------|
|                                                                                                       | Non/ex drinker<br>(N=1,594) | Light/moderate drinker<br>(N=6,676) | Heavy/excessive drinker<br>(N=2,060) |
| -4 (biggest negative (downward) difference)                                                           | 1 ( 0.1)                    | 4 ( 0.1)                            | 3 ( 0.2)                             |
| -3                                                                                                    | 2 ( 0.1)                    | 22 ( 0.3)                           | 10 ( 0.5)                            |
| -2                                                                                                    | 8 ( 0.5)                    | 56 ( 0.8)                           | 25 ( 1.2)                            |
| -1                                                                                                    | 45 ( 2.8)                   | 253 ( 3.8)                          | 83 ( 4.0)                            |
| 0 (no difference)                                                                                     | 1,476 (92.6)                | 6,022 (90.2)                        | 1,838 (89.2)                         |
| 1                                                                                                     | 45 ( 2.8)                   | 200 ( 3.0)                          | 70 ( 3.4)                            |
| 2                                                                                                     | 10 ( 0.6)                   | 73 ( 1.1)                           | 18 ( 0.9)                            |
| 3                                                                                                     | 5 ( 0.3)                    | 41 ( 0.6)                           | 9 ( 0.4)                             |
| 4 (biggest positive (upward) difference)                                                              | 2 ( 0.1)                    | 5 ( 0.1)                            | 4 ( 0.2)                             |
| Negative difference                                                                                   | 56 ( 3.5)                   | 335 ( 5.0)                          | 121 ( 5.9)                           |
| No difference                                                                                         | 1,476 (92.6)                | 6,022 (90.2)                        | 1,838 (89.2)                         |
| Positive difference                                                                                   | 62 ( 3.9)                   | 319 ( 4.8)                          | 101 ( 4.9)                           |
| Mean difference relative to non-drinkers                                                              |                             |                                     |                                      |
| adjusted for baseline deprivation quintile                                                            | 0.00                        | 0.02 (-0.00, 0.05)                  | 0.01 (-0.02, 0.05)                   |
| adjusted for baseline deprivation quintile, age and sex                                               | 0.00                        | 0.02 (-0.01, 0.04)                  | 0.00 (-0.03, 0.04)                   |
| adjusted for baseline deprivation quintile, age, sex and time<br>from interview to prescription       | 0.00                        | 0.02 (-0.01, 0.04)                  | 0.00 (-0.03, 0.04)                   |
| adjusted for baseline deprivation quintile, age, sex, time<br>from interview to prescription and wave | 0.00                        | 0.02 (-0.01, 0.04)                  | 0.00 (-0.03, 0.04)                   |

Table 4: Difference in SIMD quintile between baseline and follow up (hospital admission, prescription but excluding death) by drinking status at baseline

| Difference in SIMD quintile                                                                           | Baseline drinking status    |                                 |                            |
|-------------------------------------------------------------------------------------------------------|-----------------------------|---------------------------------|----------------------------|
|                                                                                                       | Non/ex drinker<br>(N=2,753) | Non binge drinker<br>(N=11,326) | Binge drinker<br>(N=2,957) |
| -4 (biggest negative (downward) difference)                                                           | 8 ( 0.3)                    | 24 ( 0.2)                       | 5 ( 0.2)                   |
| -3                                                                                                    | 13 ( 0.5)                   | 70 ( 0.6)                       | 28 ( 1.0)                  |
| -2                                                                                                    | 33 ( 1.2)                   | 179 ( 1.6)                      | 69 ( 2.3)                  |
| -1                                                                                                    | 92 ( 3.3)                   | 441 ( 3.9)                      | 131 ( 4.4)                 |
| 0 (no difference)                                                                                     | 2,451 (89.0)                | 9,980 (88.1)                    | 2,441 (82.6)               |
| 1                                                                                                     | 103 ( 3.7)                  | 366 ( 3.2)                      | 154 ( 5.2)                 |
| 2                                                                                                     | 34 ( 1.2)                   | 160 ( 1.4)                      | 82 ( 2.8)                  |
| 3                                                                                                     | 13 ( 0.5)                   | 87 ( 0.8)                       | 36 ( 1.2)                  |
| 4 (biggest positive (upward) difference)                                                              | 6 ( 0.2)                    | 19 ( 0.2)                       | 11 ( 0.4)                  |
| Negative difference                                                                                   | 146 ( 5.3)                  | 714 ( 6.3)                      | 233 ( 7.9)                 |
| No difference                                                                                         | 2,451 (89.0)                | 9,980 (88.1)                    | 2,441 (82.6)               |
| Positive difference                                                                                   | 156 ( 5.7)                  | 632 ( 5.6)                      | 283 ( 9.6)                 |
| Mean difference relative to non-drinkers                                                              |                             |                                 |                            |
| adjusted for baseline deprivation quintile                                                            | 0.00                        | 0.04 (0.02, 0.07)               | 0.06 (0.03, 0.09)          |
| adjusted for baseline deprivation quintile, age and sex                                               | 0.00                        | 0.04 (0.02, 0.07)               | 0.06 (0.02, 0.09)          |
| adjusted for baseline deprivation quintile, age, sex and time<br>from interview to prescription       | 0.00                        | 0.04 (0.02, 0.07)               | 0.06 (0.02, 0.09)          |
| adjusted for baseline deprivation quintile, age, sex, time<br>from interview to prescription and wave | 0.00                        | 0.04 (0.01, 0.07)               | 0.05 (0.02, 0.09)          |

Table 5: Difference in area-based deprivation quintile between baseline and follow up (hospital admission, prescription but excluding death) by drinking status at baseline for participants from 2008 onwards

| Difference in SIMD quintile                                                                           | Baseline drinking status    |                                |                            |
|-------------------------------------------------------------------------------------------------------|-----------------------------|--------------------------------|----------------------------|
|                                                                                                       | Non/ex drinker<br>(N=1,594) | Non binge drinker<br>(N=7,105) | Binge drinker<br>(N=1,625) |
| -4 (biggest negative (downward) difference)                                                           | 1 ( 0.1)                    | 5 ( 0.1)                       | 1 ( 0.1)                   |
| -3                                                                                                    | 2 ( 0.1)                    | 21 ( 0.3)                      | 10 ( 0.6)                  |
| -2                                                                                                    | 8 ( 0.5)                    | 63 ( 0.9)                      | 19 ( 1.2)                  |
| -1                                                                                                    | 45 ( 2.8)                   | 279 ( 3.9)                     | 58 ( 3.6)                  |
| 0 (no difference)                                                                                     | 1,476 (92.6)                | 6,426 (90.4)                   | 1,428 (87.9)               |
| 1                                                                                                     | 45 ( 2.8)                   | 202 ( 2.8)                     | 69 ( 4.3)                  |
| 2                                                                                                     | 10 ( 0.6)                   | 62 ( 0.9)                      | 29 ( 1.8)                  |
| 3                                                                                                     | 5 ( 0.3)                    | 41 ( 0.6)                      | 8 ( 0.5)                   |
| 4 (biggest positive (upward) difference)                                                              | 2 ( 0.1)                    | 6 ( 0.1)                       | 3 ( 0.2)                   |
| Negative difference                                                                                   | 56 ( 3.5)                   | 338 ( 4.8)                     | 88 ( 5.4)                  |
| No difference                                                                                         | 1,476 (92.6)                | 6,426 (90.4)                   | 1,428 (87.9)               |
| Positive difference                                                                                   | 62 ( 3.9)                   | 311 ( 4.4)                     | 109 ( 6.7)                 |
| Mean difference relative to non-drinkers                                                              |                             |                                |                            |
| adjusted for baseline deprivation quintile                                                            | 0.00                        | 0.02 (-0.01, 0.04)             | 0.03 (-0.00, 0.07)         |
| adjusted for baseline deprivation quintile, age and sex                                               | 0.00                        | 0.01 (-0.01, 0.04)             | 0.02 (-0.01, 0.06)         |
| adjusted for baseline deprivation quintile, age, sex and time<br>from interview to prescription       | 0.00                        | 0.01 (-0.01, 0.04)             | 0.02 (-0.02, 0.06)         |
| adjusted for baseline deprivation quintile, age, sex, time<br>from interview to prescription and wave | 0.00                        | 0.01 (-0.01, 0.04)             | 0.02 (-0.02, 0.05)         |

Table 6: Difference in area-based deprivation quintile between baseline and follow-up (from first hospital admission, prescription or death), distinguishing ex-drinkers from non-drinkers

| Difference in area-based deprivation quintile                                                         | Baseline drinking status |                         |                                         |                                         |
|-------------------------------------------------------------------------------------------------------|--------------------------|-------------------------|-----------------------------------------|-----------------------------------------|
|                                                                                                       | Non-drinker<br>(N=1,781) | Ex-drinker<br>(N=1,848) | Light/moderate<br>drinker<br>(N=18,439) | Heavy/excessive<br>drinker<br>(N=5,351) |
| -4 (biggest negative (downward) difference)                                                           | 6 (0.3)                  | 3 (0.2)                 | 46 (0.3)                                | 16 (0.3)                                |
| -3                                                                                                    | 9 (0.5)                  | 5 (0.3)                 | 144 (0.8)                               | 45 (0.8)                                |
| -2                                                                                                    | 23 (1.3)                 | 18 (1.0)                | 326 (1.8)                               | 125 (2.3)                               |
| -1                                                                                                    | 52 (2.9)                 | 59 (3.2)                | 733 (4.0)                               | 214 (4.0)                               |
| 0 (no difference)                                                                                     | 1,583 (88.9)             | 1,687 (91.3)            | 15,915 (86.3)                           | 4,492 (84.0)                            |
| 1                                                                                                     | 67 (3.8)                 | 51 (2.8)                | 692 (3.8)                               | 251 (4.7)                               |
| 2                                                                                                     | 28 (1.6)                 | 13 (0.7)                | 352 (1.9)                               | 123 (2.3)                               |
| 3                                                                                                     | 8 (0.5)                  | 8 (0.4)                 | 193 (1.1)                               | 65 (1.2)                                |
| 4 (biggest positive (upward) difference)                                                              | 5 (0.3)                  | 4 (0.2)                 | 38 (0.2)                                | 20 (0.4)                                |
| Negative difference                                                                                   | 90 (5.1)                 | 85 (4.6)                | 1,249 (6.8)                             | 400 (7.5)                               |
| No difference                                                                                         | 1,583 (88.9)             | 1,687 (91.3)            | 15,915 (86.3)                           | 4,492 (84.0)                            |
| Positive difference                                                                                   | 108 (6.1)                | 76 (4.1)                | 1,275 (6.9)                             | 459 (8.6)                               |
| Mean difference relative to non-drinkers                                                              |                          |                         |                                         |                                         |
| adjusted for baseline deprivation quintile                                                            | 0.00                     | -0.03 (-0.08, 0.01)     | 0.02 (-0.00, 0.06)                      | 0.05 (0.02, 0.09)                       |
| adjusted for baseline deprivation quintile, age and sex                                               | 0.00                     | -0.03 (-0.08, 0.01)     | 0.03 (-0.01, 0.06)                      | 0.05 (0.01, 0.08)                       |
| adjusted for baseline deprivation quintile, age, sex and time<br>from interview to prescription       | 0.00                     | -0.03 (-0.08, 0.01)     | 0.03 (-0.01, 0.06)                      | 0.05 (0.01, 0.08)                       |
| adjusted for baseline deprivation quintile, age, sex, time<br>from interview to prescription and wave | 0.00                     | -0.03 (-0.08, 0.01)     | 0.03 (-0.01, 0.06)                      | 0.04 (0.01, 0.08)                       |

Table 7: Difference in area-based deprivation quintile between baseline and follow-up (from first hospital admission, prescription or death), distinguishing excessive drinkers from heavy drinkers

| Difference in area-based deprivation quintile                                                         | Baseline drinking status    |                                      |                            |                                |
|-------------------------------------------------------------------------------------------------------|-----------------------------|--------------------------------------|----------------------------|--------------------------------|
|                                                                                                       | Non/ex drinker<br>(N=3,629) | Light/moderate drinker<br>(N=18,439) | Heavy drinker<br>(N=4,332) | Excessive drinker<br>(N=1,019) |
| -4 (biggest negative (downward) difference)                                                           | 9 (0.3)                     | 46 (0.3)                             | 14 (0.3)                   | 2 (0.2)                        |
| -3                                                                                                    | 14 (0.4)                    | 144 (0.8)                            | 32 (0.7)                   | 13 (1.3)                       |
| -2                                                                                                    | 41 (1.1)                    | 326 (1.8)                            | 100 (2.3)                  | 25 (2.5)                       |
| -1                                                                                                    | 111 (3.1)                   | 733 (4.0)                            | 175 (4.0)                  | 39 (3.8)                       |
| 0 (no difference)                                                                                     | 3,270 (90.1)                | 15,915 (86.3)                        | 3,627 (83.7)               | 865 (84.9)                     |
| 1                                                                                                     | 118 (3.3)                   | 692 (3.8)                            | 203 (4.7)                  | 48 (4.7)                       |
| 2                                                                                                     | 41 (1.1)                    | 352 (1.9)                            | 114 (2.6)                  | 9 (0.9)                        |
| 3                                                                                                     | 16 (0.4)                    | 193 (1.1)                            | 50 (1.2)                   | 15 (1.5)                       |
| 4 (biggest positive (upward) difference)                                                              | 9 (0.3)                     | 38 (0.2)                             | 17 (0.4)                   | 3 (0.3)                        |
| Negative difference                                                                                   | 175 (4.8)                   | 1,249 (6.8)                          | 321 (7.4)                  | 79 (7.8)                       |
| No difference                                                                                         | 3,270 (90.1)                | 15,915 (86.3)                        | 3,627 (83.7)               | 865 (84.9)                     |
| Positive difference                                                                                   | 184 (5.1)                   | 1,275 (6.9)                          | 384 (8.9)                  | 75 (7.4)                       |
| Mean difference relative to non-drinkers                                                              |                             |                                      |                            |                                |
| adjusted for baseline deprivation quintile                                                            | 0.00                        | 0.05 (0.02, 0.07)                    | 0.08 (0.06, 0.11)          | 0.01 (-0.04, 0.05)             |
| adjusted for baseline deprivation quintile, age and sex                                               | 0.00                        | 0.04 (0.02, 0.07)                    | 0.08 (0.05, 0.11)          | 0.00 (-0.05, 0.05)             |
| adjusted for baseline deprivation quintile, age, sex and time<br>from interview to prescription       | 0.00                        | 0.04 (0.02, 0.07)                    | 0.08 (0.05, 0.11)          | -0.00 (-0.05, 0.05)            |
| adjusted for baseline deprivation quintile, age, sex, time<br>from interview to prescription and wave | 0.00                        | 0.04 (0.02, 0.07)                    | 0.08 (0.05, 0.11)          | -0.00 (-0.05, 0.04)            |
